# Supplementary material for: Observed and simulated time evolution of HCl, ClONO 2 , and HF total column abundances
Source: Copernicus journal article supplement (doi:10.5194/acp-12-3527-2012), 2012-04-12
Supplement: Supplementary file 1 [file acp-12-3527-2012-supplement.pdf]

Supplement to:

Observed and simulated time evolution of HCl, ClONO<sub>2</sub>,  
and HF total column abundances

Atmos. Chem. Phys., 2012

by R. Kohlhepp et al.

15 March 2012

Table 1: Overview of the measurement specifications for HCl.

| Measurement site         | Spectral resolution [cm <sup>-1</sup> ] | Spectral microwindows [cm <sup>-1</sup> ]                                                                                                                                                                                        | Retrieved interfering species                                                                                                       | Source of p/T profiles                        | Retrieval code | Spectroscopic database                                                                                            | Reference                   |
|--------------------------|-----------------------------------------|----------------------------------------------------------------------------------------------------------------------------------------------------------------------------------------------------------------------------------|-------------------------------------------------------------------------------------------------------------------------------------|-----------------------------------------------|----------------|-------------------------------------------------------------------------------------------------------------------|-----------------------------|
| Eureka DA8 (1997-2006)   | 0.004                                   | 2925.70-2926.10                                                                                                                                                                                                                  | NO <sub>2</sub>                                                                                                                     | radiosondes, NCEP, US Sub-Arctic Winter Model | SFIT1.09e      | HITRAN 1992 plus updates                                                                                          | Fast et al. (2011)          |
| Eureka 125HR (2006-2009) | 0.0035                                  | 2775.72-2775.80<br>2821.40-2821.62<br>2925.75-2926.05                                                                                                                                                                            | O <sub>3</sub> , CH <sub>4</sub> , N <sub>2</sub> O; HDO, N <sub>2</sub> O; CH <sub>4</sub> , NO <sub>2</sub> , OCS, O <sub>3</sub> | radiosondes, NCEP, US St. Atm.                | SFIT2 v3.92C   | HITRAN 2004 plus updates                                                                                          | Batchelor et al. (2009)     |
| Ny Ålesund               | 0.005                                   | 2925.65-2926.25                                                                                                                                                                                                                  | CH <sub>4</sub>                                                                                                                     | NCEP                                          | GFIT           | updated ATMOS linelist from GFIT package, v2.6.4                                                                  | Notholt et al. (1995b)      |
| Thule                    | 0.0035                                  | 2727.60-2727.95<br>2775.60-2775.95<br>2925.70-2926.10                                                                                                                                                                            | O <sub>3</sub> , CH <sub>4</sub> , HDO                                                                                              | NCEP                                          | SFIT2 v3.93    | HITRAN 2004 plus updates to 2007                                                                                  | Hannigan et al. (2009)      |
| Kiruna                   | 0.005                                   | 2727.73-2727.82<br>2775.73-2775.79<br>2819.52-2819.61<br>2821.52-2821.62<br>2843.60-2843.65<br>2904.09-2904.14<br>2923.65-2923.78<br>2925.80-2926.00<br>2942.70-2942.75<br>2961.04-2961.09<br>2963.25-2963.32<br>2995.76-2995.79 | H <sub>2</sub> O, O <sub>3</sub> , CH <sub>4</sub>                                                                                  | NCEP                                          | PROFFIT        | HITRAN 2004                                                                                                       | Blumenstock et al. (2006)   |
| Poker Flat               | 0.0035                                  | 2925.80-2926.00                                                                                                                                                                                                                  | H <sub>2</sub> O, CH <sub>4</sub> , NO <sub>2</sub> , O <sub>3</sub>                                                                | radiosondes, UKMO, CIRA86                     | SFIT2 v3.7     | HITRAN 2004                                                                                                       | Kagawa et al. (2007)        |
| Harestua                 |                                         | 2925.60-2926.20<br>2925.75-2926.00                                                                                                                                                                                               | H <sub>2</sub> O, CH <sub>4</sub> , NO <sub>2</sub> , HCl, O <sub>3</sub>                                                           | NCEP                                          | SFIT2 v3.81    | HITRAN 2004                                                                                                       |                             |
| Zugspitze                | 0.005                                   | 2925.74-2926.06                                                                                                                                                                                                                  | CH <sub>4</sub>                                                                                                                     | Munich radiosonde                             | SFIT1.09e      | HITRAN 1996                                                                                                       | Sussmann and Schäfer (1997) |
| Jungfraujoch             | 0.003                                   | 2925.74-2926.06                                                                                                                                                                                                                  | CH <sub>4</sub> , NO <sub>2</sub>                                                                                                   | NCEP                                          | SFIT1.09c      | HITRAN 1992                                                                                                       | Rinsland et al. (2003)      |
| Toronto                  | 0.004                                   | 2925.80-2926.00                                                                                                                                                                                                                  | CH <sub>4</sub> , NO <sub>2</sub> , O <sub>3</sub>                                                                                  | NCEP, US St. Atm.                             | SFIT2 v3.82B3  | HITRAN 2004                                                                                                       | Wiacek et al. (2007)        |
| Tsukuba                  | 0.0035                                  | 2925.69-2926.21                                                                                                                                                                                                                  | CH <sub>4</sub> , H <sub>2</sub> O                                                                                                  | radiosondes at Tateno                         | SFIT1.09e      | HITRAN 1996                                                                                                       | Murata et al. (2005)        |
| Izaña                    | 0.0036                                  | same as Kiruna                                                                                                                                                                                                                   | H <sub>2</sub> O, O <sub>3</sub> , CH <sub>4</sub>                                                                                  | local radiosondes                             | PROFFIT        | HITRAN 2004                                                                                                       | Schneider et al. (2005)     |
| Mauna Loa                | 0.0035                                  | 2925.69-2926.50                                                                                                                                                                                                                  | CH <sub>4</sub>                                                                                                                     | radiosondes at Hilo                           | SFIT1          | HITRAN 2000                                                                                                       | Hannigan et al. (2009)      |
| La Réunion and 0.00893   | 0.00513 and 0.00893                     | 2925.70-2926.10                                                                                                                                                                                                                  | CH <sub>4</sub>                                                                                                                     | NCEP                                          | SFIT2 v3.9     | HITRAN 2004 plus updates for H <sub>2</sub> O, N <sub>2</sub> O, HNO <sub>3</sub> , C <sub>2</sub> H <sub>6</sub> | Senten et al. (2008)        |
| Wollongong               | 0.0035                                  | 2925.80-2926.00                                                                                                                                                                                                                  | CH <sub>4</sub>                                                                                                                     | NCEP                                          | GFIT           | HITRAN 2004                                                                                                       | Rinsland et al. (2003)      |
| Lauder                   | 0.0035                                  | 2925.75-2926.05                                                                                                                                                                                                                  | CH <sub>4</sub> , NO <sub>2</sub> , H <sub>2</sub> O, O <sub>3</sub>                                                                | NCEP/NCAR                                     | SFIT2 v3.82B3  | HITRAN 2000                                                                                                       | Rinsland et al. (2003)      |
| Arrival Heights          | 0.0035                                  | 2925.75-2926.05                                                                                                                                                                                                                  | CH <sub>4</sub> , NO <sub>2</sub> , H <sub>2</sub> O, O <sub>3</sub>                                                                | NCEP/NCAR                                     | SFIT2 v3.82B3  | HITRAN 2000                                                                                                       | Mahieu et al. (2008)        |

Table 2: Overview of the measurement specifications for ClONO<sub>2</sub>.

| Measurement site         | Spectral resolution [cm <sup>-1</sup> ] | Spectral microwindows [cm <sup>-1</sup> ]             | Retrieved interfering species                                                                                                                 | Source of p/T profiles                        | Retrieval code | Spectroscopic database                                  | Reference                   |
|--------------------------|-----------------------------------------|-------------------------------------------------------|-----------------------------------------------------------------------------------------------------------------------------------------------|-----------------------------------------------|----------------|---------------------------------------------------------|-----------------------------|
| Eureka DA8 (1997-2006)   | 0.004                                   | 779.550-781.100                                       | O <sub>3</sub> , H <sub>2</sub> O, CO <sub>2</sub> , C <sub>2</sub> H <sub>2</sub>                                                            | radiosondes, NCEP, US Sub-Arctic Winter Model | SFIT1.09e      | HITRAN 1992 plus updates                                | Fast et al. (2011)          |
| Eureka 125HR (2006-2009) | 0.0035                                  | 779.850-780.450<br>782.550-782.870<br>938.300-939.300 | CO <sub>2</sub> , O <sub>3</sub> , HNO <sub>3</sub> ; O <sub>3</sub> , CO <sub>2</sub> , H <sub>2</sub> O, HNO <sub>3</sub> ; CO <sub>2</sub> | radiosondes, NCEP, US St. Atm.                | SFIT2 v3.92C   | HITRAN 2004 plus updates                                | Batchelor et al. (2009)     |
| Ny Ålesund               | 0.005                                   | 778.640-782.800                                       | O <sub>3</sub> , CO <sub>2</sub> , H <sub>2</sub> O, C <sub>2</sub> H <sub>2</sub>                                                            | NCEP                                          | GFIT           | updated ATMOS-linelist from GFIT package, v2.6.4        | Notholt et al. (1995b)      |
| Thule                    | 0.01                                    | 780.120-780.320<br>780.700-781.250                    | O <sub>3</sub> , CO <sub>2</sub>                                                                                                              | NCEP                                          | SFIT2 v3.93    | HITRAN 2004 plus updates to 2007                        | Hannigan et al. (2009)      |
| Kiruna                   | 0.005                                   | 779.000-779.800<br>780.000-780.300<br>780.300-781.300 | H <sub>2</sub> O, CO <sub>2</sub> , O <sub>3</sub> , HNO <sub>3</sub> , C <sub>2</sub> H <sub>2</sub>                                         | NCEP                                          | PROFFIT        | HITRAN 2004                                             | Blumenstock et al. (2006)   |
| Harestua                 |                                         | 779.500-780.700<br>779.905-780.340                    | CO <sub>2</sub> , H <sub>2</sub> O, O <sub>3</sub> , ClONO <sub>2</sub> , HNO <sub>3</sub>                                                    | NCEP                                          | SFIT2 v3.81    | HITRAN 2004                                             |                             |
| Zugspitze                | 0.0036                                  | 779.300-780.600<br>780.050-780.355                    | H <sub>2</sub> O, O <sub>3</sub> , CO <sub>2</sub>                                                                                            | Munich radiosonde                             | SFIT2 v3.8     | HITRAN 1996 with Birk parameters for ClONO <sub>2</sub> | Sussmann and Schäfer (1997) |
| Jungfraujoch             | 0.005                                   | 779.300-780.600<br>780.050-780.355                    | Wide: H <sub>2</sub> O, O <sub>3</sub> , CO <sub>2</sub> ;<br>Narrow: O <sub>3</sub> , HNO <sub>3</sub> , COF <sub>2</sub>                    | NCEP                                          | SFIT2 v3.81    | HITRAN 1996 including Birk and Wagner line parameters   | Rinsland et al. (2003)      |
| Izaña                    | 0.0036                                  | 779.000-779.800<br>780.000-780.300<br>780.300-781.300 | H <sub>2</sub> O, CO <sub>2</sub> , O <sub>3</sub> , HNO <sub>3</sub> , C <sub>2</sub> H <sub>2</sub>                                         | local radiosondes                             | PROFFIT        | HITRAN 2004                                             | Schneider et al. (2005)     |
| Wollongong               | 0.0035                                  | 779.300-780.600<br>780.050-780.355                    | Wide: O <sub>3</sub> , H <sub>2</sub> O, CO <sub>2</sub> , C <sub>2</sub> H <sub>2</sub> ; Narrow: none                                       | NCEP                                          | SFIT2 v3.92    | HITRAN 2004                                             | Rinsland et al. (2003)      |
| Lauder                   | 0.0035                                  | 779.300-780.600<br>780.050-780.355                    | Wide: O <sub>3</sub> , H <sub>2</sub> O, CO <sub>2</sub> , C <sub>2</sub> H <sub>2</sub> ; Narrow: none                                       | NCEP/NCAR                                     | SFIT2 v3.82B3  | HITRAN 2000                                             | Rinsland et al. (2003)      |
| Arrival Heights          | 0.0035                                  | 779.300-780.600<br>780.050-780.355                    | Wide: O <sub>3</sub> , H <sub>2</sub> O, CO <sub>2</sub> , C <sub>2</sub> H <sub>2</sub> ; Narrow: none                                       | NCEP/NCAR                                     | SFIT2 v3.82B3  | HITRAN 2000                                             | Rinsland et al. (2003)      |

Table 3: Overview of the measurement specifications for HF.

| Measurement site         | Spectral resolution [cm <sup>-1</sup> ] | Spectral microwindows [cm <sup>-1</sup> ] | Retrieved interfering species               | Source of p/T profiles                        | Retrieval code | Spectroscopic database                                                                                       | Reference                   |
|--------------------------|-----------------------------------------|-------------------------------------------|---------------------------------------------|-----------------------------------------------|----------------|--------------------------------------------------------------------------------------------------------------|-----------------------------|
| Eureka DA8 (1997-2006)   | 0.004                                   | 4038.780-4039.100                         | H <sub>2</sub> O                            | radiosondes, NCEP, US Sub-Arctic Winter Model | SFIT1.09e      | HITRAN 1992 plus updates                                                                                     | Fast et al. (2011)          |
| Eureka 125HR (2006-2009) | 0.0035                                  | 4038.780-4039.100                         | H <sub>2</sub> O, HDO, CH <sub>4</sub>      | radiosondes, NCEP, US St. Atm.                | SFIT2 v3.92C   | HITRAN 2004 plus updates                                                                                     | Batchelor et al. (2009)     |
| Ny Ålesund               | 0.005                                   | 4038.600-4039.240                         | H <sub>2</sub> O                            | NCEP                                          | GFIT           | updated ATMOS-linelist from GFIT package, v2.6.4                                                             | Notholt et al. (1995a)      |
| Thule                    | 0.0035                                  | 4000.800-4001.200<br>4038.750-4039.200    | H <sub>2</sub> O, CH <sub>4</sub> , HDO     | NCEP                                          | SFIT2 v3.93    | HITRAN 2004 plus updates to 2007                                                                             | Hannigan et al. (2009)      |
| Kiruna                   | 0.0075                                  | 4000.900-4001.050<br>4038.850-4039.080    | H <sub>2</sub> O                            | NCEP                                          | PROFFIT        | HITRAN 2004                                                                                                  | Blumenstock et al. (2006)   |
| Poker Flat               | 0.0035                                  | 4038.804-4039.148                         | H <sub>2</sub> O                            | radiosondes, UKMO, CIRA86                     | SFIT2 v3.7     | HITRAN 2004                                                                                                  | Kagawa et al. (2007)        |
| Harestua                 |                                         | 4038.100-4039.500<br>4038.860-4039.050    | H <sub>2</sub> O, HDO, CH <sub>4</sub> , HF | NCEP                                          | SFIT2 v3.81    | HITRAN 2004                                                                                                  |                             |
| Zugspitze                | 0.0078                                  | 4038.800-4039.100                         | H <sub>2</sub> O column                     | Munich Radiosonde                             | SFIT1.09e      | HITRAN 1996                                                                                                  | Sussmann and Schäfer (1997) |
| Jungfraujoch             | 0.004                                   | 4038.800-4039.105                         | CH <sub>4</sub> , NO <sub>2</sub>           | NCEP                                          | SFIT1.09c      | HITRAN 1992                                                                                                  | Zander et al. (2008)        |
| Toronto                  | 0.004                                   | 4038.770-4039.130                         | H <sub>2</sub> O, HDO, CH <sub>4</sub>      | NCEP, US St. Atm.                             | SFIT2 v3.82B3  | HITRAN 2004                                                                                                  | Wiacek et al. (2007)        |
| Tsukuba                  | 0.0035                                  | 4038.800-4039.100                         | H <sub>2</sub> O, HDO, CH <sub>4</sub>      | radiosonde                                    | SFIT1.09e      | HITRAN 1996                                                                                                  | Murata et al. (2005)        |
| Izaña                    | 0.0036                                  | 4000.900-4001.050<br>4038.850-4039.080    | H <sub>2</sub> O                            | local radiosondes                             | PROFFIT        | HITRAN 2004                                                                                                  | Schneider et al. (2005)     |
| Mauna Loa                | 0.0035                                  | 4038.850-4039.050                         | H <sub>2</sub> O                            | radiosondes at Hilo                           | SFIT1          | HITRAN 2000                                                                                                  | Hannigan et al. (2009)      |
| La Réunion               | 0.0072                                  | 4038.700-4039.050                         | H <sub>2</sub> O                            | NCEP                                          | SFIT2 v3.9     | HITRAN 2004 updates for H <sub>2</sub> O, N <sub>2</sub> O, HNO <sub>3</sub> , C <sub>2</sub> H <sub>6</sub> | Senten et al. (2008)        |
| Wollongong               | 0.0035                                  | 4038.810-4039.090                         | H <sub>2</sub> O                            | NCEP                                          | GFIT           | HITRAN 2004                                                                                                  | Mahieu et al. (2008)        |
| Lauder                   | 0.0035                                  | 4038.780-4039.0995                        | H <sub>2</sub> O, HDO, CH <sub>4</sub>      | NCEP/NCAR                                     | SFIT2 v3.82B3  | HITRAN 2000                                                                                                  | Reisinger et al. (1994)     |
| Arrival Heights          | 0.0035                                  | 4038.780-4039.100                         | H <sub>2</sub> O, HDO, CH <sub>4</sub>      | NCEP/NCAR                                     | SFIT2 v3.82B3  | HITRAN 2000                                                                                                  | Reisinger et al. (1994)     |
